# Supplementary material for: A Study on Comprehensive Evaluation Methods for Coordinated Development of Water Diversion Projects Based on Advanced SWOT Analysis and Coupling Coordination Model
Source: MDPI journal article supplement (doi:10.3390/su132413600), 2021-12-09
Supplement: s1 [file s1]

Archive with 1 entries (1 files):
- sustainability-1494040-supplementary.pdf
